# Supplementary material for: Genetic Background of Metabolically Healthy and Unhealthy Obesity Phenotypes in Hungarian Adult Sample Population
Source: MDPI journal article supplement (doi:10.3390/ijms24065209), 2023-03-08
Supplement: s1 [file s1]

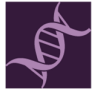

**Supplementary Table S1.** A summary table of single nucleotide polymorphisms (SNPs) investigated (included or excluded), their risk alleles in the genes affected, their best-fitted inheritance models for metabolically unhealthy obesity (MUO), the typical biochemical traits affected, the genetic risk score (GRS) optimization process Cox & Snell R Squares- and *p*-values.

| No. | SNP        | Gene           | Risk allele | Best-fitted models of inheritance | Trait               | Cox & Snell R Square | <i>p</i> -value | Optimized GRS |
|-----|------------|----------------|-------------|-----------------------------------|---------------------|----------------------|-----------------|---------------|
| 1   | rs10838687 | <i>MADD</i>    | T           | codominant                        | Glucose homeostasis | 0.125                | 2.43E-03        | Included      |
| 2   | rs693      | <i>APOB</i>    | G           | codominant                        | Lipid metabolism    | 0.144                | 3.90E-05        | Included      |
| 3   | rs1111875  | <i>HHEX</i>    | C           | codominant                        | Glucose homeostasis | 0.163                | 9.29E-07        | Included      |
| 4   | rs2000813  | <i>LIPG</i>    | C           | codominant                        | Lipid metabolism    | 0.175                | 8.77E-08        | Included      |
| 5   | rs1801282  | <i>PPARG</i>   | C           | recessive                         | Obesity             | 0.194                | 2.46E-09        | Included      |
| 6   | rs11558471 | <i>SLC30A8</i> | G           | codominant                        | Glucose homeostasis | 0.202                | 5.29E-10        | Included      |
| 7   | rs2241766  | <i>ADIPOQ</i>  | T           | dominant                          | Obesity             | 0.209                | 1.45E-10        | Included      |
| 8   | rs328      | <i>LPL</i>     | C           | dominant                          | Lipid metabolism    | 0.212                | 8.00E-11        | Included      |
| 9   | rs3846662  | <i>HMGCR</i>   | A           | dominant                          | Lipid metabolism    | 0.210                | 9.70E-11        | Excluded      |
| 10  | rs1532624  | <i>CETP</i>    | C           | recessive                         | Lipid metabolism    | 0.221                | 2.16E-11        | Included      |
| 11  | rs10830963 | <i>MTNR1B</i>  | G           | recessive                         | Glucose homeostasis | 0.220                | 3.11E-11        | Excluded      |
| 12  | rs2144300  | <i>GALNT2</i>  | C           | dominant                          | Lipid metabolism    | 0.216                | 3.57E-11        | Excluded      |
| 13  | rs4846914  | <i>GALNT2</i>  | G           | dominant                          | Lipid metabolism    | 0.216                | 3.57E-11        | Excluded      |
| 14  | rs708272   | <i>CETP</i>    | G           | recessive                         | Lipid metabolism    | 0.197                | 2.89E-09        | Excluded      |
| 15  | rs3736594  | <i>MRPL33</i>  | A           | codominant                        | Glucose homeostasis | 0.220                | 2.44E-11        | Excluded      |
| 16  | rs174550   | <i>FADS1</i>   | T           | dominant                          | Glucose homeostasis | 0.206                | 3.16E-10        | Excluded      |
| 17  | rs1387153  | <i>MTNR1B</i>  | T           | recessive                         | Glucose homeostasis | 0.220                | 2.76E-11        | Excluded      |
| 18  | rs4939883  | <i>LIPG</i>    | T           | dominant                          | Lipid metabolism    | 0.217                | 5.33E-11        | Excluded      |
| 19  | rs173539   | <i>CETP</i>    | T           | dominant                          | Lipid metabolism    | 0.231                | 4.97E-12        | Included      |
| 20  | rs11071657 | <i>C2CD4B</i>  | G           | dominant                          | Glucose homeostasis | 0.223                | 1.30E-11        | Excluded      |
| 21  | rs1800588  | <i>LIPC</i>    | C           | dominant                          | Lipid metabolism    | 0.234                | 4.57E-12        | Included      |
| 22  | rs1532085  | <i>ALDH1A2</i> | G           | codominant                        | Lipid metabolism    | 0.228                | 1.28E-11        | Excluded      |
| 23  | rs10938397 | <i>PRDX4P1</i> | A           | recessive                         | Obesity             | 0.229                | 1.12E-11        | Excluded      |

|    |            |                |   |            |                     |       |          |          |
|----|------------|----------------|---|------------|---------------------|-------|----------|----------|
| 24 | rs2191349  | <i>GTF3AP5</i> | G | recessive  | Glucose homeostasis | 0.233 | 1.02E-11 | Excluded |
| 25 | rs1137101  | <i>LEPR</i>    | G | dominant   | Obesity             | 0.220 | 3.36E-11 | Excluded |
| 26 | rs7499892  | <i>CETP</i>    | C | dominant   | Lipid metabolism    | 0.238 | 2.66E-12 | Included |
| 27 | rs10946398 | <i>CDKAL1</i>  | A | codominant | Glucose homeostasis | 0.230 | 7.02E-12 | Excluded |
| 28 | rs6499640  | <i>FTO</i>     | G | dominant   | Obesity             | 0.228 | 1.26E-11 | Excluded |
| 29 | rs6265     | <i>BDNF</i>    | T | dominant   | Obesity             | 0.233 | 3.89E-12 | Excluded |
| 30 | rs1077834  | <i>LIPC</i>    | T | dominant   | Lipid metabolism    | 0.226 | 2.26E-11 | Excluded |
| 31 | rs2070895  | <i>LIPC</i>    | G | dominant   | Lipid metabolism    | 0.226 | 2.26E-11 | Excluded |
| 32 | rs2548861  | <i>WVOX</i>    | G | recessive  | Lipid metabolism    | 0.224 | 2.40E-11 | Excluded |
| 33 | rs11671664 | <i>GIPR</i>    | A | codominant | Glucose homeostasis | 0.246 | 9.23E-13 | Included |
| 34 | rs6773957  | <i>ADIPOQ</i>  | G | dominant   | Obesity             | 0.239 | 2.24E-12 | Excluded |
| 35 | rs5219     | <i>KCNJ11</i>  | T | dominant   | Glucose homeostasis | 0.233 | 6.71E-12 | Excluded |
| 36 | rs7173964  | <i>C2CD4B</i>  | G | dominant   | Glucose homeostasis | 0.246 | 8.14E-13 | Included |
| 37 | rs5882     | <i>CETP</i>    | A | dominant   | Lipid metabolism    | 0.246 | 7.60E-13 | Included |
| 38 | rs1501299  | <i>ADIPOQ</i>  | G | dominant   | Obesity             | 0.246 | 6.80E-13 | Included |
| 39 | rs17782313 | <i>MC4R</i>    | T | dominant   | Obesity             | 0.246 | 8.91E-13 | Excluded |
| 40 | rs12970134 | <i>MC4R</i>    | G | dominant   | Obesity             | 0.246 | 8.96E-13 | Excluded |
| 41 | rs4775041  | <i>ALDH1A2</i> | G | recessive  | Lipid metabolism    | 0.236 | 7.85E-12 | Excluded |
| 42 | rs1861868  | <i>FTO</i>     | C | recessive  | Obesity             | 0.232 | 8.15E-12 | Excluded |
| 43 | rs2338104  | <i>KCTD10</i>  | G | dominant   | Lipid metabolism    | 0.253 | 3.65E-13 | Included |
| 44 | rs10468017 | <i>ALDH1A2</i> | T | recessive  | Lipid metabolism    | 0.251 | 5.27E-13 | Excluded |
| 45 | rs10906115 | <i>CDC123</i>  | G | dominant   | Glucose homeostasis | 0.233 | 8.84E-12 | Excluded |
| 46 | rs7903146  | <i>TCF7L2</i>  | C | dominant   | Glucose homeostasis | 0.249 | 5.62E-13 | Excluded |
| 47 | rs1558902  | <i>FTO</i>     | A | recessive  | Obesity             | 0.243 | 1.90E-12 | Excluded |
| 48 | rs780094   | <i>GCKR</i>    | C | dominant   | Glucose homeostasis | 0.240 | 1.40E-12 | Excluded |
| 49 | rs2867125  | <i>TMEM18</i>  | C | recessive  | Obesity             | 0.242 | 1.37E-12 | Excluded |
| 50 | rs340874   | <i>PROX1</i>   | T | codominant | Glucose homeostasis | 0.247 | 6.30E-13 | Excluded |
| 51 | rs11920090 | <i>SLC2A2</i>  | A | recessive  | Glucose homeostasis | 0.255 | 3.29E-13 | Included |
| 52 | rs9939609  | <i>FTO</i>     | A | recessive  | Obesity             | 0.241 | 2.31E-12 | Excluded |
| 53 | rs10885122 | <i>BTBD7P2</i> | G | recessive  | Glucose homeostasis | 0.251 | 9.60E-13 | Excluded |
| 54 | rs9941349  | <i>FTO</i>     | C | recessive  | Obesity             | 0.246 | 1.19E-12 | Excluded |

|    |            |                 |   |            |                     |       |          |          |
|----|------------|-----------------|---|------------|---------------------|-------|----------|----------|
| 55 | rs10811661 | <i>CDKN2B</i>   | C | recessive  | Glucose homeostasis | 0.258 | 2.65E-13 | Included |
| 56 | rs6548238  | <i>TMEM18</i>   | C | recessive  | Obesity             | 0.245 | 1.08E-12 | Excluded |
| 57 | rs2815752  | <i>RPL31P12</i> | G | recessive  | Obesity             | 0.256 | 3.15E-13 | Excluded |
| 58 | rs7944584  | <i>MADD</i>     | T | codominant | Glucose homeostasis | 0.252 | 4.32E-13 | Excluded |
| 59 | rs4149268  | <i>ABCA1</i>    | C | dominant   | Lipid metabolism    | 0.248 | 7.53E-13 | Excluded |
| 60 | rs9989419  | <i>CETP</i>     | A | recessive  | Lipid metabolism    | 0.244 | 2.23E-12 | Excluded |
| 61 | rs1801260  | <i>CLOCK</i>    | G | dominant   | Obesity             | 0.236 | 3.26E-12 | Excluded |
| 62 | rs660339   | <i>UCP2</i>     | A | codominant | Obesity             | 0.247 | 7.92E-13 | Excluded |
| 63 | rs560887   | <i>G6PC2</i>    | T | dominant   | Glucose homeostasis | 0.229 | 1.74E-11 | Excluded |
| 64 | rs1121980  | <i>FTO</i>      | A | recessive  | Obesity             | 0.241 | 3.36E-12 | Excluded |
| 65 | rs925946   | <i>BDNF-AS</i>  | T | recessive  | Obesity             | 0.253 | 6.30E-13 | Excluded |
| 66 | rs7034200  | <i>GLIS3</i>    | A | dominant   | Glucose homeostasis | 0.241 | 3.77E-12 | Excluded |
| 67 | rs659366   | <i>UCP2</i>     | T | dominant   | Obesity             | 0.234 | 4.65E-12 | Excluded |
