# Supplementary material for: Genetic Background of Metabolically Healthy and Unhealthy Obesity Phenotypes in Hungarian Adult Sample Population
Source: MDPI journal article supplement (doi:10.3390/ijms24065209), 2023-03-08
Supplement: s1 [file s1]

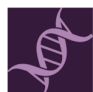

**Supplementary Table S2.** Association of optimized genetic risk score with different parameters associated with the metabolically unhealthy obesity.

|                                      | $\beta$ -value (95%CI) | <i>p</i> -value |
|--------------------------------------|------------------------|-----------------|
| BMI (kg/m <sup>2</sup> )             | -0.13 (-0.16 – 0.87)   | 0.871           |
| Waist circumference (cm)             | 0.27 (-0.31 – 0.37)    | 0.874           |
| Systolic blood pressure (mmHg)       | 1.00 (0.34 – 1.65)     | 0.003*          |
| Diastolic blood pressure (mmHg)      | 0.24 (-0.12 – 0.60)    | 0.184           |
| Fasting triglycerides level (mmol/L) | 0.07 (0.01 – 0.13)     | 0.024*          |
| Fasting HDL-C level (mmol/L)         | -0.01 (-0.02 – 0.01)   | 0.084           |
| Fasting glucose level (mmol/L)       | 0.08 (-0.01 – 0.15)    | 0.032*          |
| Fasting insulin (mU/L)               | 0.96 (-0.06 – 1.99)    | 0.066           |
| HOMA-IR                              | 0.07 (0.01 – 0.14)     | 0.016*          |
| CRP (mg/L)                           | -0.03 (-0.20 – 0.15)   | 0.770           |

\*,  $p < 0.05$ , \*\*: significance threshold determined after Bonferroni test correction:  $p < 0.0026$ .

Note: Multivariate linear regression models were adjusted for age, sex, BMI (except in the case where BMI was the outcome variable), education, anti-hypertensive, antidiabetic, and lipid-lowering treatment. 95%CI: 95% confidence intervals; BMI: body mass index; HDL-C: high-density lipoprotein cholesterol; HOMA-IR: homeostasis model assessment of insulin resistance; CRP: C-reactive protein.
